# Supplementary material for: Bioactivity of Common Pesticidal Plants on Fall Armyworm Larvae (Spodoptera frugiperda)
Source: PubMed Central journal article supplement (PMC7020173; doi:10.3390/plants9010112), 2020-01-15
Supplement: plants-09-00112-s001.pdf [file plants-09-00112-s001.pdf]

Table S1. Effects of treatments and their interactions subjected to 2-way Analysis of Variance. The means of treatments and interactions were compared using the Tukey HSD test at the 95% confidence interval. In each experiment, mean values followed with the same letter are not different from each other.

\* indicates significance at  $P < 0.05$ ; \*\* indicates significance at  $P < 0.0001$ .

| Water extracts         | Contact toxicity,<br>percent mortality<br>10% | Feeding toxicity,<br>percent mortality<br>10% |
|------------------------|-----------------------------------------------|-----------------------------------------------|
| Control +              | 100 a                                         | 100 a                                         |
| <i>A. indica</i>       | 0 d                                           | 53 ab                                         |
| <i>A. vera</i>         | 26 bcd                                        | 6 c                                           |
| <i>C. citratus</i>     | 53 abc                                        | 13 c                                          |
| <i>L. camara</i>       | 0 d                                           | 6 c                                           |
| <i>L. javanica</i>     | 80 a                                          | 0 c                                           |
| <i>N. tabacum</i>      | 86 a                                          | 80 ab                                         |
| <i>O. basilicum</i>    | 66 ab                                         | 53 ab                                         |
| <i>T. emetica</i>      | 13 cd                                         | 20 c                                          |
| <i>T. vogelii</i>      | 0 d                                           | 6 c                                           |
| <i>V. amygdalina</i>   | 26 bcd                                        | 40 bc                                         |
| Control -              | 0 d                                           | 0 c                                           |
| F treatment            | 14.24**                                       | 9.19**                                        |
| F application method   | 0.47                                          |                                               |
| F treat. * app. method | 11.06**                                       |                                               |

| Methanol extracts   | Contact toxicity, percent mortality |          |          |        |        | Feeding toxicity, percent mortality |            |           |            |            |
|---------------------|-------------------------------------|----------|----------|--------|--------|-------------------------------------|------------|-----------|------------|------------|
|                     | 0.1%                                | 1%       | 3%       | 5%     | 10%    | 0.1%                                | 1%         | 3%        | 5%         | 10%        |
| Control +           | 100 a                               | 98 a     | 98 a     | 98 a   | 98 a   | 100 a                               | 98 a       | 98.000 a  | 98 a       | 98 a       |
| <i>A. indica</i>    | 0 h                                 | 16 fgh   | 18 efgh  | 16 fgh | 60 bc  | 30 bcdefghi                         | 31 bcdefgh | 32 defgh  | 34 bcdefgh | 36 bcdefgh |
| <i>C. citratus</i>  | 24 defgh                            | 28 defg  | 44 bcde  | 46 bcd | 50 bcd | 8 hi                                | 14 hi      | 15 hi     | 16 hi      | 16 hi      |
| <i>L. javanica</i>  | 10 fgh                              | 18 efgh  | 26 defgh | 56 bc  | 66 b   | 48 bcdefg                           | 50 bcdef   | 48 bcdefg | 52 bcde    | 62 b       |
| <i>N. tabacum</i>   | 26 defgh                            | 26 defgh | 34 cdef  | 60 bc  | 66 b   | 54 bcd                              | 56 bcd     | 58 bc     | 58 bc      | 60 b       |
| <i>O. basilicum</i> | 2 gh                                | 2 gh     | 0 h      | 4 gh   | 4 gh   | 14 hi                               | 18 fghi    | 16 ghi    | 20 efghi   | 26 cdefghi |
| Control -           | 0 h                                 | 0 h      | 2 h      | 0 h    | 0 h    | 0 i                                 | 0 i        | 4 i       | 0 i        | 0 i        |
| F treatment         | 92.05**                             |          |          |        |        | 168.71**                            |            |           |            |            |
| F concentration     | 3.31*                               |          |          |        |        | 0.18                                |            |           |            |            |
| F treat. * conc.    | 46.461**                            |          |          |        |        | 27.07**                             |            |           |            |            |

| Water extracts 10%<br>w/v) on infested<br>maize plants | Leaf damage<br>index |
|--------------------------------------------------------|----------------------|
| Control +                                              | 1.77 d               |
| <i>L. javanica</i>                                     | 5.02 bc              |
| <i>N. tabacum</i>                                      | 4.56 c               |
| <i>O. basilicum</i>                                    | 5.22 bc              |
| Control -                                              | 6.48 a               |
| Control - w                                            | 6.22 a               |
| Control - ws                                           | 5.36 b               |
| F treatment                                            | 90.89**              |
